# Supplementary material for: The Genetic Legacy of the Expansion of Turkic-Speaking Nomads across Eurasia
Source: PLoS Genet. 2015 Apr 21;11(4):e1005068. doi: 10.1371/journal.pgen.1005068 (PMC4405460; doi:10.1371/journal.pgen.1005068)
Supplement: S3 Table — (XLS) [file pgen.1005068.s011.xls]

## Sheet: suppl_table_from_Yunusbayev_et_
Geographic region	Population						Abbreviation	Li et al.2	Behar et al.1	Yunusbayev et al.3	This study	Total
West Asia	Jordanians						Jor		20			20
	Iranians						Irn		20			20
	Turks						Tur		19			19
	Azeris from Iran										16	16
	Palestinians							46				46
	Syrians								16			16
Caucasus	Armenians						Arm			16		16
	Georgians						Grg		20			20
	Abkhasians						Abh			20		20
	Balkars						Blk			20		20
	Adyghe						Ady	17				17
	N Ossetians						NOs			15		15
	Chechens						Che			20		20
	Lezgins						Lzg		18			18
	Kuban Nogays						Nog			16		16
	Kumyks						Kum			13		13
Europe	French						Fre	28				28
	French Basques						FrB	24				24
	N Italians						NIt	13				13
	Tuscans						Tus	7				7
	Cypriots						Cyp			12		12
	Romanians						Rmn		16			16
	Bulgarians						Bul			13		13
	Ukrainians						Ukr			20		20
	Belorussians						Blr		9			9
	Lithuanians						Lit		10			10
	Russians						Rus	25	2			27
	Chuvashs						Chv		17			17
Jews	Georgian Jews						GrJ		8			8
	Mountain Jews						MnJ		4			4
	Iranian Jews						InJ		4			4
	Iraq Jews						IqJ		11			11
Central Asia	Tajiks						Tjk			15		15
	Turkmens						Trm			15		15
	Kurds (sampled in Kazakhstan)						Krd			6		6
	Uzbeks						Uzb		15			15
	Uygur						Uyg	10				10
	Altaians						Alt			13		13
South Asia	Hazara						Haz	22				22
	Pathan						Ptn	22				22
	Burusho						Bur	25				25
	Balochi						Blo	24				24
	Brahui						Brh	25				25
	Makrani						Mak	25				25
	Sindhi						Sin	24				24
Siberia	Yakuts						Yak	25				25
East Asia	Cambodians						Cam	10				10
	Dai						Dai	10				10
	Lahu						Lah	8				8
	Han						Han	44				44
	Daur						Dau	9				9
	Oroqen						Oro	9				9
	Mongolas						Mng	10				10
	Japanese						Jap	28				28
Total								639	267	214
Grand Total												1120

## Sheet: suppl_table_1
Population samples used in IBD sharing analysis
Geographic region	Population	longitude	latitude	Dataset	western Turkic population	Geographic neighbor for
Middle East	Jordanians	36.08	30.52	Included		Azeris (Northwestern Iran)/Turks
	Iranians	53.24	32.33	Included		Azeris (Northwestern Iran)/Turkmens/Uzbeks/Kazakhs/Kyrgyz
	Palestinians	35	32	Included		Turks
	Syrians	38.3	35.24	Included		Azeris (Northwestern Iran)/Turks
	Turks	34.48	39.17	Included	wtp
	Azeris (Northwestern Iran)	46.33	37.49	Included	wtp
	Kurds	NA	NA	NA
Caucasus	Abkhasians	40.987	43.006	Included		Kumyks/Balkars/Turks
	Adyghe	39	44	Included		Kumyks/Nogais/Balkars
	Armenians	44.535	40.206	Included		Azeris (Northwestern Iran)/Turks
	Balkars	43.616	43.316	Included	wtp
	Chechens	45.678	43.309	Included		Kumyks/Nogais/Balkars
	Kumyks	46.498	43.608	Included	wtp
	Lezgins	47.772	41.59	Included		Kumyks/Nogais/Balkars/Azeris (Northwestern Iran)
	Georgians	41.734	42.628	Included		Kumyks/Balkars/Azeris(Northwestern Iran)/Turks
	Nogais (Kuban)	41.931	44.351	Included	wtp
	North Ossetians	44.673	43.03	Included		Kumyks/Nogais/Balkars
	Kalmyks	45.19	46.34	Included
	Azeris (Dagestan)	NA	NA	NA
	Kabardins	NA	NA	NA
Europe	Spaniards	-2.41	40.37	Included
	French	2	46	Included
	Germans	10.14	51.1	Included
	Italians (North Italy)	12.29	42.56	Included
	Italians (Tuscany)	NA	NA	NA
	Karelians	33.05	62.43	Included		Tatars/Chuvashes/Bashkirs
	Lithuanians	24.03	55	Included
	Maris	55.42	55.36	Included		Tatars/Chuvashes/Nogais/Bashkirs
	Hungarians	18.52	47.3	Included
	Bulgarians	25.31	42.42	Included		Turks
	Belarusians	28.12	53.14	Included
	Gagauzes	28.15	45.5	Included
	Greeks	21.5	39.04	Included		Turks
	Mordvins	45.1	54.1	Included		Tatars/Chuvashes/Nogais/Bashkirs
	Orcadians	-3	59	Included
	Romanians	24.53	45.49	Included		Turks
	Russians (Central)	37.27	54.44	Included		Tatars/Chuvashes/Bashkirs
	Russians (North)	40	61	Included
	Ukrainians	32.18	48.38	Included
	Vepsas	33	63.49	Included		Tatars/Chuvashes/Bashkirs
	Udmurts	53.13	56.5	Included		Tatars/Chuvashes/Bashkirs
	Tatars	53.52	54.36	Included	wtp
	Bashkirs	57.11	53.52	Included	wtp
	Chuvashes	47.14	56.08	Included	wtp
	Komis	50.48	61.41	Included		Tatars/Chuvashes/Bashkirs
South Asia	Balochi	66	30.5	Included
	Brahui	66.5	30.5	Included
	Hazara	70	33.5	Included
	Pathans	70.5	33.5	Included		Turkmens/Uzbeks
	Brahmins	NA	NA	NA
	Kshatriya	NA	NA	NA
	Kanjars	NA	NA	NA
Central Asia	Tajiks	69.18	38.59	Included		Turkmens/Uzbeks/Kazakhs/Kyrgyz
	Tajiks (Pamir)	NA	NA	NA
	Yaghnobi people	NA	NA	NA
	Kazakhs	71	50	Included	wtp
	Kyrgyz	74.19	41.14	Included	wtp
	Uzbeks	66.25	39.5	Included	wtp
	Turkmens	58.53	38.26	Included	wtp
	Karakalpaks	NA	NA	NA
	Uygurs	81	44	Included
Siberia	Buryats	109.45	53.13	Included
	Chukchis	172.35	65.4	Included
	Evenkis	116	66	Included
	Tuvans	94.17	51.31	Included
	Nenets (Forest)	NA	NA	NA
	Nenets (Tundra)	86	68	Included
	Nganasans	98.16	74.35	Included
	Yakuts	129.5	63	Included
	Dolgans	112	73	Included
	Altaians	87	50.44	Included
	Khakas	90	53.3	Included
	Yukaghirs	NA	NA	NA
	Koryaks	NA	NA	NA
	Evens	NA	NA	NA
	Kets	NA	NA	NA
	Nivkhs	NA	NA	NA
	Shors	NA	NA	NA
Eastern Asia	Hezhens	133	47.5	Included
	Han	114	27.5	Included
	Daurs	124	48.5	Included
	Mongols (Mongolia)	100	48.5	Included
	Mongolas (Northern China)	119	48.5	Included
	Oroqens	126.5	50.5	Included
	Xibo	81.5	43.5	Included
	Naxi	NA	NA	NA
	Tu	101	36	Included
	Yizu	103	28	Included
	Japanese	138	38	Included
	Tujia	109	29	Included
	Miaozu	109	28	Included
	Dai	100	21	Included
	Lahu	100	22	Included
	She	119	27	Included
